# Supplementary material for: A highly precise micro-analytical XRF method for compositional characterization of fast breeder reactor fuels
Source: Royal Society of Chemistry journal article supplement (doi:10.1039/d1ja00306b), 2021-11-15
Supplement: d1ja00306b1.pdf [file d1ja00306b1.pdf]

## Supplementary Information (SI)

### A Highly Precise Micro-analytical XRF Method for Compositional Characterization of Fast Breeder Reactor Fuels

Kaushik Sanyal<sup>a,c</sup>, Buddhadev Kanrar<sup>a,c</sup>, Shiny S Suresh<sup>b,c</sup>, Sangita Dhara<sup>a,c\*</sup>

<sup>a</sup>Fuel Chemistry Division, Bhabha Atomic Research Centre, Mumbai, 400085

<sup>b</sup>Radiochemistry Division, Bhabha Atomic Research Centre, Mumbai, 400085

<sup>c</sup>Homi Bhabha National Institute, Anushakti Nagar, Mumbai, 400094

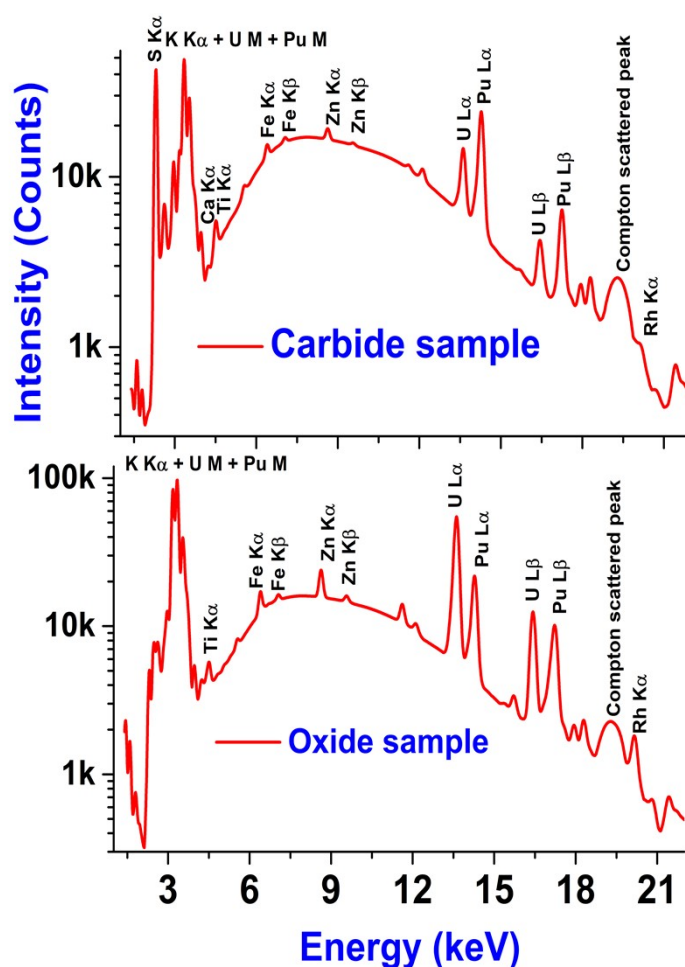

**Figure S1:** Micro-XRF spectra of one carbide sample and one oxide sample with logarithmic scale.

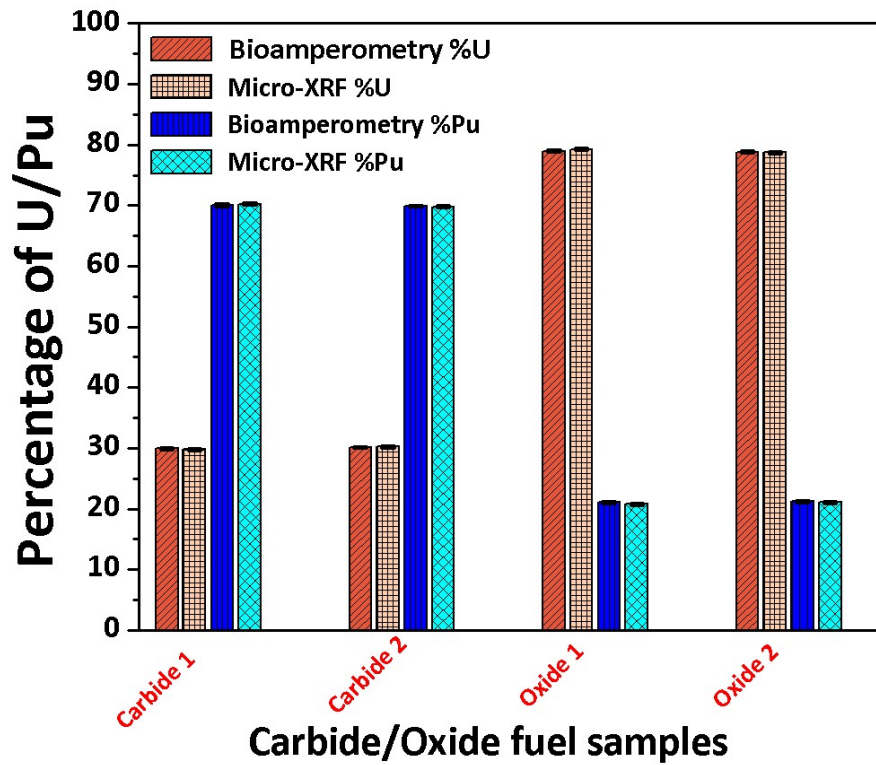

**Figure S2 :** Comparison of bioamperometry and  $\mu$ -XRF based method for the determination of relative percentage of U and Pu in carbide and oxide fuel samples
